# Supplementary material
Source: PubMed Central journal article supplement (PMC3387121)
Supplement: 1120603109_pnas.201120603SI.pdf [file 1120603109_pnas.201120603SI.pdf]

# Supporting Information

Hopkins et al. 10.1073/pnas.1120603109

## SI Methods

**1.1 Site Description.** Litter and soil were collected at two free air CO<sub>2</sub> enrichment (FACE) experiments: Duke Forest FACE near Chapel Hill, North Carolina and Aspen FACE near Rhineland, Wisconsin.

**1.1.1 Duke FACE.** The Duke FACE site, under forest cover since at least the 1940s, was burned and planted with loblolly pine (*Pinus taeda* L.) in 1983. Year-round CO<sub>2</sub> enrichment began in 1996 in three of four replicate plots. A prototype plot that served as the fourth replicate was additionally fumigated during the summers of 1994 and 1995 (1). There was no difference in C-isotope values of soils from the prototype plot and the values of the other three replicates. Loblolly pine dominates the aboveground biomass, with deciduous trees in the understory. The soils are low-fertility acidic clay loam Hapludalfs in the Enon Series, and they are poorly drained during wet periods. In 2005, the top 15 cm mineral soil had an average C content of 2.16 kg C m<sup>-2</sup> ( $\pm 0.15$ ) and 2.10 kg C m<sup>-2</sup> ( $\pm 0.18$ ) and  $\delta^{13}\text{C}$  signature of  $-27.40$  ( $\pm 0.04$ ) and  $-30.86$  ( $\pm 0.32$ ) in ambient and elevated CO<sub>2</sub> plots, respectively (2). During the period of the FACE experiment, C was accumulating in the soils of both the ambient and elevated CO<sub>2</sub> plots because of recovery from disturbance (3).

**1.1.2 Aspen FACE.** The Aspen FACE site was agricultural land for at least 50 y up to 1972, when it was purchased by the US Department of Agriculture Forest Service and subsequently used for short-rotation forestry. The site was cleared and disked in 1996 and 1997, and Aspen clones (*Populus tremuloides* Michx.) were planted on one-half of each FACE plot in June of 1997. The remaining one-half of each plot was planted as one-quarter aspen with paper birch and one-quarter aspen with sugar maple, but for this experiment, only soils from the aspen monoculture were used. CO<sub>2</sub> fumigation began in 1998. Soils are Pandus clay loam: mixed, frigid, coarse loamy Alfic Haplorthods. Soil C contents increased linearly since the experiment began; in 2008, soil C was measured as 5.12 ( $\pm 1.13$ ) kg C m<sup>-2</sup> in ambient CO<sub>2</sub> plots and 3.27 ( $\pm 0.8$ ) kg C m<sup>-2</sup> in elevated CO<sub>2</sub> plots for the top 20 cm mineral soil, and soil C in elevated CO<sub>2</sub> plots was  $-31.1\%$  in  $\delta^{13}\text{C}$  (4).

**1.2 FACE Experiments.** Both experiments enriched CO<sub>2</sub> levels by 200  $\mu\text{mol mol}^{-1}$  for the whole stands in each 30-m diameter treatment plot (1). The added CO<sub>2</sub> was derived from natural gas, which is very depleted in  $^{13}\text{C}$  and  $^{14}\text{C}$  relative to the background atmosphere. Fumigation gas was  $-43\%$  in  $\delta^{13}\text{C}$  and  $-1,000\%$  in  $\Delta^{14}\text{C}$  (5–7) compared with  $-8\%$  in  $\delta^{13}\text{C}$  and  $40$ – $110\%$  in  $\Delta^{14}\text{C}$  for the background atmosphere over the period of the FACE experiments (8, 9). The  $\delta^{13}\text{C}$  of roots and leaves in elevated CO<sub>2</sub> plots confirms fixation of CO<sub>2</sub> with the expected isotopic admixture of fumigation gas and background air; root ingrowth cores measured root inputs as  $-39\%$  at Duke, and roots picked from soil cores the year before our sampling (2008) measured root inputs as  $-39\%$  at Aspen (10, 4, respectively).

**1.3 Sampling Procedure.** We sampled the top 0–15 cm mineral soil plus the overlying litter layer in each of the elevated and ambient CO<sub>2</sub> plots. We treated each FACE ring or experimental plot as the level of replication (Duke  $n = 4$ , Aspen  $n = 3$ ).

Organic soil (litter layer) and mineral soils were collected from the Duke FACE on July 7, 2008. We sampled the litter layer by cutting a 100-cm<sup>2</sup> rectangle of all organic material found above the mineral soil surface. Mineral soils were sampled under the cleared area down to 15-cm depth using a 5-cm diameter slide

hammer corer. Litter and mineral soils were collected at Aspen FACE on July 1, 2009. After surface litter removal, mineral soils were sampled with a 5-cm diameter impact corer in increments of 0–5 and then 5–15 cm.

**1.4 Incubation Procedure.** Soils were transported to the laboratory on ice and refrigerated before incubation. For both soils, rocks and roots were removed before incubation. For Duke soils, whole soil cores (minus roots) were placed in interior containers inside of 2-L Mason jars at field moisture content, and a subsample was taken after incubation to determine water content. For the Aspen site, mineral soils were additionally sieved to 4 mm, composited by ring, and then split using a cone and quarter method. About 140 g soil were used for incubation, with a subsample taken to determine soil moisture content before incubation. Because Aspen soils dried out during sieving, deionized water was added to soils after they were in incubation jars to return them to field moisture level.

Soils were kept at field moisture over the incubation period by high relative humidity inside of incubation jars. Soils were incubated continuously at site mean annual temperature,  $+10$  °C, and  $+20$  °C of warming, (Aspen: 5 °C, 15 °C, and 25 °C; Duke: 15 °C, 25 °C, and 25 °C;  $\pm 1$  °C) for around 1 d before CO<sub>2</sub> fluxes were measured for the first time. Temperature treatments were monitored by a Stowaway Tidbit Temperature Logger (Onset Corporation) kept alongside soil samples during incubation and sampling. Soils were removed briefly from their temperature treatments for flux sampling (less than 1 h per sampling). Jars were removed from their temperature treatments and allowed to come to room temperature (24 °C) before CO<sub>2</sub> was removed from the jar.

**1.5 CO<sub>2</sub> flux and isotope sampling.** For soil CO<sub>2</sub> flux and isotope measurements, jars were capped with modified Mason jar lids fitted with stopcock-type sampling ports. Effective jar volume and potential leakage were checked by measuring the pressure change on expansion of the jar headspace into an evacuated known volume (11). At the beginning of the flux measurement period, jar headspace was purged with CO<sub>2</sub>-free air at 1 L min<sup>-1</sup> until the jar's volume had been completely purged at least three times before closing the jar and allowing CO<sub>2</sub> to accumulate in the headspace. Headspace CO<sub>2</sub> concentrations were measured in 2-mL syringe samples injected upstream of a CO<sub>2</sub> scrubber and air pump in line with a Licor 6252 Infrared Gas Analyzer (12). Fluxes were calculated as the CO<sub>2</sub> evolved for the effective jar volume for a given incubation time.

For each flux sampling period, we measured  $\delta^{13}\text{C}$ -CO<sub>2</sub> on air sampled directly from the jar headspace. Syringe samples were injected into He-filled vials for measurement of  $\delta^{13}\text{C}$ -CO<sub>2</sub> by continuous flow isotope ratio MS (Thermo Finnigan Gas Bench coupled to Delta Plus).  $\delta^{13}\text{C}$  values are reported relative to the Pee Dee Belemnite standard.

For measurement of  $\Delta^{14}\text{C}$ -CO<sub>2</sub>, jar headspace CO<sub>2</sub> was allowed to build up to 0.3–2.5% and then was collected using an evacuated container. CO<sub>2</sub> was purified cryogenically on a vacuum line and then reduced to graphite using the methods in the work by Xu et al. (13). Radiocarbon content of samples was measured at University of California at Irvine's W. M. Keck Carbon Cycle Accelerator Mass Spectrometer facility (14). Data are reported as  $\Delta^{14}\text{C}$ , the per mil difference in radiocarbon content relative to 95% of the activity of the oxalic acid I standard.  $\Delta^{14}\text{C}$  was corrected for fractionation by normalizing to

–25‰ for samples from the ambient CO<sub>2</sub> plots (15). In enriched CO<sub>2</sub> atmospheres, the C-isotope signature of C fixed in photosynthesis does not just reflect C-isotope fractionation but rather, fractionation plus the mixing of different source gases (i.e., fumigation gas and atmosphere). Therefore, a different fractionation correction for  $\Delta^{14}\text{C}$  must be used. Using the method from the work of Torn and Southon (16), we assumed that fractionation of C isotopes in photosynthesis was similar between CO<sub>2</sub> treatments, and we used the  $\delta^{13}\text{C}$  values for ambient CO<sub>2</sub> soils to correct for mass-dependent fractionation in elevated CO<sub>2</sub> soils.

Error is reported as the SEM of samples from replicate plots, reflecting spatial heterogeneity among plots within the experiment sites. Error was propagated in isotopic mixing calculations using the procedure outlined in the work by Phillips and Gregg (17). Precision of all measurements was better than the SEM of replicate plots.

**1.6 Postincubation.** After incubation, Duke soils were sieved to 2 mm to remove any remaining rocks, and subsampled for soil moisture determination. No differences in soil moisture were found between temperature treatments. Both Duke and Aspen soils were dried at 60 °C and ground for analysis of bulk solid sample C and C-isotope content. Percent C and  $\delta^{13}\text{C}$  were measured on aliquots of each sample using an NA 1500 NC elemental analyzer (Fisons Instruments) coupled to isotope ratio MS (as previously described).

**1.7 Bomb <sup>14</sup>C Modeling.** We used the record of Northern Hemisphere atmospheric <sup>14</sup>C content (9) and a steady-state, one-pool model of <sup>14</sup>C to determine the mean residence time of CO<sub>2</sub> respired during incubation (18). The model works on annual time steps, assuming that all C input to soil has the <sup>14</sup>C signature of that year's atmosphere. The decomposition rate, *k*, is inversely proportional to the turnover time of the modeled soil C pool, which is, in turn, closely related to that pool's mean residence time (assuming no lags in living tissue). If we consider the respired CO<sub>2</sub> to be coming from one homogeneous pool, *k* can be determined from  $\Delta^{14}\text{C}$  of CO<sub>2</sub> respired. The model is solved independently for each treatment by iteratively adjusting *k* until model <sup>14</sup>C content equals the <sup>14</sup>C content of observation. The turnover time, estimated from 1/*k*, represents the mean age of carbon being respired assuming a homogeneous C pool that contributes to microbial respiration. This mean age includes time spent by C in living tissues (e.g., roots or twigs) as well as the mean time for decomposition.

**1.8 Isotopic Mixing Model. 1.8.1 <sup>14</sup>C mixing model.** We used an isotopic mixing model to take advantage of the decade-long FACE label. The principle of the model is similar to the principle of the <sup>13</sup>C mixing models used extensively at the FACE sites; we use the difference between <sup>14</sup>C content of preexisting soil C and FACE label C added since initiation of CO<sub>2</sub> fumigation. First, we calculate the <sup>14</sup>C signature of the FACE atmosphere (elevated CO<sub>2</sub> plots) for the mixture of background air and fossil-derived (–1,000‰) fumigation gas (Eq. S1):

$$\Delta^{14}\text{C}^{\text{FACE}} = \Delta^{14}\text{C}^{\text{new}} \left( \frac{[\text{CO}_2]_{\text{atm}}}{[\text{CO}_2]_{\text{FACE}}} \right) - 1000\text{‰} \left( \frac{[\text{CO}_2]_{\text{FACE}} - [\text{CO}_2]_{\text{atm}}}{[\text{CO}_2]_{\text{FACE}}} \right). \quad \text{[S1]}$$

We used the daytime CO<sub>2</sub> concentration records (7:00 AM to 7:00 PM) for experimental plots from the website of the two experiments (Duke, <http://face.env.duke.edu>; Aspen, <http://aspenface.mtu.edu>) to define the average CO<sub>2</sub> concentration of ambient and elevated CO<sub>2</sub> plots from the beginning of the CO<sub>2</sub> experiment to the year before the sampling.  $[\text{CO}_2]_{\text{atm}}$ , the at-

mospheric CO<sub>2</sub> content in ambient plots (and the background CO<sub>2</sub> endmember for the elevated CO<sub>2</sub> plots), is defined as the average ( $\pm$ SD) CO<sub>2</sub> concentration in ambient CO<sub>2</sub> plots (Duke, 379  $\pm$  7; Aspen, 370  $\pm$  18), and  $[\text{CO}_2]_{\text{FACE}}$  is the measured CO<sub>2</sub> concentration in elevated CO<sub>2</sub> plots (Duke, 534  $\pm$  16; Aspen, 531  $\pm$  13). We assumed the  $\Delta^{14}\text{C}^{\text{new}}$  was equal to the  $\Delta^{14}\text{C}$  of the atmosphere in the year of sampling (Duke, 45‰; Aspen, 40‰), with a 5‰ error bar reflecting the seasonal cycle of Northern Hemisphere atmospheric  $\Delta^{14}\text{C}$  (9).

Using the atmosphere's  $\Delta^{14}\text{C}$  value as the new (<10 y)  $\Delta^{14}\text{C}$  endmember assumes that all flux is coming from pools either <1 or >10 y old. However, the model is very insensitive to this endmember value because of the large isotopic difference between the CO<sub>2</sub> in FACE elevated CO<sub>2</sub> plots and ambient CO<sub>2</sub> plots. We tested this assumption by increasing  $\Delta^{14}\text{C}^{\text{new}}$  by about 10‰ to simulate a mix of substrates with a 3 y mean residence time. This endmember changed the estimated proportion of flux from the pre-FACE pool by 0.01 (4% of original estimate).

Then, we partition fluxes from both ambient and elevated CO<sub>2</sub> plots into >10 and <10 y components by writing two mass balance equations for the flux (Eq. S2):

$$\text{CO}_2^{\text{elev}} = \text{CO}_2^{>10\text{y}} + \text{CO}_2^{<10\text{y},\text{elev}} \quad \text{[S2]}$$

and (Eq. S3)

$$\text{CO}_2^{\text{amb}} = \text{CO}_2^{>10\text{y}} + \text{CO}_2^{<10\text{y},\text{amb}}. \quad \text{[S3]}$$

We also wrote two equations for mass balance of the isotopes of flux (Eq. S4):

$$\Delta^{14}\text{C}^{\text{elev}} \text{CO}_2^{\text{elev}} = \Delta^{14}\text{C}^{>10\text{y}} \text{CO}_2^{>10\text{y}} + \Delta^{14}\text{C}^{\text{FACE}} \text{CO}_2^{<10\text{y},\text{elev}} \quad \text{[S4]}$$

and (Eq. S5)

$$\Delta^{14}\text{C}^{\text{amb}} \text{CO}_2^{\text{amb}} = \Delta^{14}\text{C}^{>10\text{y}} \text{CO}_2^{>10\text{y}} + \Delta^{14}\text{C}^{\text{new}} \text{CO}_2^{<10\text{y},\text{amb}}. \quad \text{[S5]}$$

If we assume the flux and  $\Delta^{14}\text{C}$  content of the >10 y pool are the same for both CO<sub>2</sub> treatments (i.e., CO<sub>2</sub> fumigation had no effect on decomposition rates of previously existing soil C), then the system of equations can be solved for the fluxes from the <10 y pool of the elevated CO<sub>2</sub> treatment and ambient CO<sub>2</sub> treatment. In the original model (Fig. 3), we partitioned fluxes separately for each temperature treatment and site, deriving an independent  $\Delta^{14}\text{C}^{>10\text{y}}$  for each incubation temperature.

**1.8.2 Modified <sup>14</sup>C mixing model.** We modified the CO<sub>2</sub> flux mixing model for the warming treatments by adding another CO<sub>2</sub> source pool to account for changes in the isotopic signature of respiration substrate with warming. First, we selected fluxes that represent the same amount of total C respired for each temperature treatment: 2.68% of soil carbon at Duke and 0.11% of soil carbon at Aspen. Second, we partitioned the fluxes from the elevated CO<sub>2</sub> treatment into FACE and pre-FACE C using the previous approach but with isotopic endmembers that did not change with temperature. In contrast to the original mixing model, where we determined  $\Delta^{14}\text{C}^{>10\text{y}}$  separately for each temperature, we fixed  $\Delta^{14}\text{C}^{>10\text{y}}$  to the value determined from the mean annual temperature control treatment. This change had little effect on the fraction of >10 y C contributing to overall flux across temperatures (Fig. 4).

From the increase in  $\Delta^{14}\text{C}$  of CO<sub>2</sub> respired from the ambient CO<sub>2</sub> treatment with warming, we know that the increased flux was of an intermediate age: >3 y because the higher  $\Delta^{14}\text{C}$  values indicate carbon fixed earlier in the bomb period but <10 y because of the proportion of pre-FACE carbon remains the same. We determined the age of additional substrates respired under warming using CO<sub>2</sub> fluxes from the ambient CO<sub>2</sub> treatment. As

previously, we assumed that the flux of >10 y C was the same for a given temperature between CO<sub>2</sub> treatments. In addition, we assumed that the contribution of C with a mean residence time of less than 1 y (i.e., C with the Δ<sup>14</sup>C signature of that year's atmosphere) was constant across temperatures, and therefore, any additional flux with warming after subtracting out the increase in >10 y C was attributed to the warming-induced pool. We then used flux and isotopic mass balance equations to solve for the Δ<sup>14</sup>C value of the warming-induced substrate, which was 7–13 y at Aspen and 9–12 y at Duke.

**1.7.3 <sup>13</sup>C mixing model.** We also used δ<sup>13</sup>C of respiration fluxes and overall soil C stock to distinguish FACE C from pre-FACE C. We solve for fraction pre-FACE C (Eq. S6):

$$f_{pre-FACE} = \frac{\delta^{13}C_{elev} - \delta^{13}C_{new}}{\delta^{13}C_{amb} - \delta^{13}C_{new}}, \quad [S6]$$

where δ<sup>13</sup>C<sub>elev</sub> is the δ<sup>13</sup>C signature of respired CO<sub>2</sub> (or soil C) from elevated CO<sub>2</sub> soils, δ<sup>13</sup>C<sub>amb</sub> is the δ<sup>13</sup>C signature of respired CO<sub>2</sub> (or soil C) from ambient CO<sub>2</sub> soils, and δ<sup>13</sup>C<sub>new</sub> is the δ<sup>13</sup>C signature of new photosynthate under CO<sub>2</sub> enrichment [Duke, −39‰ (10); Aspen, −39‰ (4)]. The model is very sensitive to the selection of the δ<sup>13</sup>C<sub>new</sub> endmember. The δ<sup>13</sup>C of microbial respiration has been observed to change with both temperature and time in incubation (11, 19). A 2‰ change in the value of δ<sup>13</sup>C<sub>new</sub> results in a 20–50% change in the calculated proportion of pre-FACE C contributing to respiration. Instead, we report the error on the fraction of pre-FACE C in Table 2 as the SEM δ<sup>13</sup>C values of mixing model components, which was propagated by the method in the work by Phillips and Gregg (17).

**1.9 Cumulative Respiration Calculations.** To correct for potential substrate limitation, we compared the same amount of C respired across temperatures (20). We chose a target amount of total C respired for which the isotopic signature could be consistently estimated across temperature treatments (2.68‰ of initial C respired for Duke and 0.11‰ of initial C respired for Aspen). We used periodic measurements of respiration and isotopes and linear interpolation between these measurements to determine cumulative amount of C respired and Δ<sup>14</sup>C values when required.

**1.9 Modeling of Data.** All nonlinear model fits to data were performed using the Marquardt method in PROC NLIN of SAS version 9.2.

**1.9.1 Modeling pool sizes and decay rates using fluxes over time.** We fit a two-pool exponential decay model to fluxes from each temperature and CO<sub>2</sub> treatment combination in the Duke FACE soils, which was similar to the method described in the work by Paul et al. (21) (Eq. S7):

$$R_t = k_a C_a e^{-k_a t} + k_s (1 - C_a) e^{-k_s t}. \quad [S7]$$

Fluxes ( $R_t$ ; units of μg C<sub>active</sub> g C<sub>soil</sub><sup>-1</sup> d<sup>-1</sup>) were measured nine times over the course of the 373 d incubation for each of the four replicates, and these data were used to fit  $k_a$  (decay rate of active pool; units of d<sup>-1</sup>),  $k_s$  (decay rate of slow pool; units of d<sup>-1</sup>), and  $C_a$  (size of active pool; units of μg C<sub>active</sub> g C<sub>soil</sub><sup>-1</sup>).

No model was fit to Aspen data; there was no trend in fluxes over time (linear regression slope of fluxes against time was not significantly different from zero).

**1.9.2 Modeling the temperature effect on partitioned fluxes.** To describe the exponential dependence of flux on temperature, we fit an exponential model (11) to FACE label-partitioned fluxes [ $R_{>10 y}(T)$ ,  $R_{<10 y}(T)$ ] for each site and CO<sub>2</sub> treatment (Eq. S8):

$$R_{>10 y}(T) = A_{>10 y} e^{b_{>10 y} T} \quad [S8]$$

and (Eq. S9)

$$R_{<10 y}(T) = A_{<10 y} e^{b_{<10 y} T}. \quad [S9]$$

Temperature dependence can be quantified as (Eq. S10)

$$\frac{\partial R}{\partial T} = b * R, \quad [S10]$$

where  $b$  is the temperature sensitivity coefficient. We fit  $A$  and  $b$  separately for pre-FACE flux ( $R_{>10 y}$ ) and FACE flux ( $R_{<10 y}$ ). We report best fits and SE estimates from the nonlinear fit procedure.

**1.11 Estimates of Decades-Old C.** To determine how much of the overall 0–15 cm mineral soil C pool is vulnerable at both sites, we related the isotopic identity of fluxes to measurable C pools in the soil. Respiration fluxes consist of annually to decadal cycling C (Table 2), and therefore, we have to determine how much of the soil C stock is cycling on these timescales. We used different methods to assess the fraction of soil C stocks vulnerable to decomposition at Duke and Aspen sites because of differences in the data available and inherent soil C age structure between the two sites. Modeling C pools at both the sites using bomb radiocarbon incorporation is complicated by the relatively recent plowing history and young stand ages. Aspen is farther from steady state than Duke, because site disturbance is more recent.

**1.11.1 Duke.** Using the rate of addition of FACE-derived C into density and size fractions, the work by Lichter et al. (2) estimated the turnover time of pools in the Duke FACE soil. To relate these experimentally determined pools to the Δ<sup>14</sup>C values of respiration, we measured the Δ<sup>14</sup>C values of size and density fractions of 0–5 cm soils taken in July of 2008 from the Duke FACE experiment plots (Fig. 5). All fractions at the Duke FACE site are dominated by bomb-derived C (i.e., decadal or younger) with the exception of the >250-μm size fraction, which is dominated by prebomb C (i.e., millennial C). We estimated the size of the decadal soil carbon pool by subtracting carbon in the >250-μm size fraction for 0- to 15-cm depth from the total soil C stock at this depth.

This estimate is in accord with a bomb radiocarbon model for soil at the Duke site, consisting of 25% of C with a mean residence time of 3,700 y and 75% of C with a mean residence time of 25 y (22).

**1.11.2 Aspen.** Because of its recent disturbance history and young stand age, the Aspen site is far from steady state, which complicates turnover time calculations for soil C fractions. All size fractions experienced an increase in FACE-derived C over 4 y of the elevated CO<sub>2</sub> treatment, meaning that none of them are completely inert (23). However, stability of pools can be inferred from changes in the amount of pre-FACE C; the work by Hofmockel et al. (23) showed a significant decrease in the amount of pre-FACE C in the fine particulate organic matter (fPOM; 53–250 μm) and mineral-associated organic matter (MAOM; <53 μm) size fractions, but no change in the amount of pre-FACE C in the coarse particulate organic matter (>250 μm) fraction.

The work by Hofmockel et al. (23) also showed no time trend in total fPOM or MAOM stocks, suggesting that the pre-FACE components of C in the fPOM and MAOM fractions are indeed single homogeneous pools at steady state with respect to the total carbon. This finding means that we can assess the relative stability of these pools by dividing the stock by the flux to confirm that these pools are turning over on the order of decades (14 y for fPOM and 40 y for MAOM). If the pre-FACE fraction of C in coarse particulate organic matter soil size class represents



a stable pool, then we can subtract it from the total soil C to get an estimate of the maximum vulnerability of soil carbon at Aspen FACE for 0–15 cm soils: 94%.

Given the very low flux rates at Aspen FACE compared with Duke FACE, we can use another approach to estimate the minimum amount of decades-old C in the Aspen FACE soils. In this study, we partitioned CO<sub>2</sub> fluxes into FACE and pre-FACE components using the  $\Delta^{14}\text{C}$  of respired CO<sub>2</sub>. We also partitioned the bulk soil C stock into FACE and pre-FACE components using  $\delta^{13}\text{C}$ , showing that C predating the FACE treatment makes up 70% of the soil C pool at the 0- to 15-cm depth but only 30% of the flux.

- Hendrey G, Ellsworth D, Lewin K, Nagy J (1999) A free-air enrichment system for exposing tall forest vegetation to elevated atmospheric CO<sub>2</sub>. *Glob Change Biol* 5: 293–309.
- Lichter J, et al. (2008) Soil carbon sequestration in a pine forest after 9 years of atmospheric CO<sub>2</sub> enrichment. *Glob Change Biol* 14:2910–2922.
- Lichter J, et al. (2005) Soil carbon sequestration and turnover in a pine forest after six years of atmospheric CO<sub>2</sub> enrichment. *Ecology* 86:1835–1847.
- Talhelm AF, Pregitzer KS, Zak DR (2009) Species-specific responses to atmospheric carbon dioxide and tropospheric ozone mediate changes in soil carbon. *Ecol Lett* 12: 1219–1228.
- Schlesinger WH, Lichter J (2001) Limited carbon storage in soil and litter of experimental forest plots under increased atmospheric CO<sub>2</sub>. *Nature* 411:466–469.
- Pregitzer K, Loya W, Kubiske M, Zak D (2006) Soil respiration in northern forests exposed to elevated atmospheric carbon dioxide and ozone. *Oecologia* 148: 503–516.
- Pataki D, et al. (2003) Tracing changes in ecosystem function under elevated carbon dioxide conditions. *Bioscience* 53:805–818.
- Department of US Commerce NESRL (2009) NOAA/ESRL/GMD CCGG Cooperative Air Sampling Network. Available at <http://www.esrl.noaa.gov/gmd/ccgg/flask.html>. Accessed Sept. 9, 2011.
- Levin I, et al. (2010) Observations and modelling of the global distribution and long-term trend of atmospheric <sup>14</sup>C(2). *Tellus B Chem Phys Meteorol* 62:26–46.
- Matamala R, González-Meler MA, Jastrow JD, Norby RJ, Schlesinger WH (2003) Impacts of fine root turnover on forest NPP and soil C sequestration potential. *Science* 302:1385–1387.
- Czimczik CI, Trumbore SE (2007) Short-term controls on the age of micro-bial carbon sources in boreal forest soils. *J Geophys Res* 112: G03001.
- Davidson E, Trumbore S (1995) Gas diffusivity and production of CO<sub>2</sub> in deep soils of the eastern Amazon. *Tellus B Chem Phys Meteorol* 47:550–565.
- Xu X, et al. (2007) Modifying a sealed tube zinc reduction method for preparation of AMS graphite targets: Reducing background and attaining high precision. *Nucl Instrum Methods Phys Res B* 259:320–329.
- Southon J, Santos G (2004) Ion source development at KCCAMS, University of California, Irvine. *Radiocarbon* 46:33–39.
- Stuiver M, Polach H (1977) Reporting of C-14 data: Discussion. *Radiocarbon* 19: 355–363.
- Torn M, Southon J (2001) A new C-13 correction for radiocarbon samples from elevated-CO<sub>2</sub> experiments. *Radiocarbon* 43:691–694.
- Phillips D, Gregg J (2001) Uncertainty in source partitioning using stable isotopes. *Oecologia* 127:171–179.
- Trumbore S (2000) Age of soil organic matter and soil respiration: Radiocarbon constraints on belowground C dynamics. *Ecol Appl* 10:399–411.
- Andrews J, Matamala R, Westover K, Schlesinger W (2000) Temperature effects on the diversity of soil heterotrophs and the delta c-13 of soil-respired CO<sub>2</sub>. *Soil Biol Biochem* 32:699–706.
- Conant RT, et al. (2008) Sensitivity of organic matter decomposition to warming varies with its quality. *Glob Change Biol* 14:868–877.
- Paul EA, Morris SJ, Bohm S (2001) *Assessment Methods for Soil Carbon*, eds Lal R, Kimble JM, Follett RF, Stewart BA (Lewis Publishers), pp 193–206.
- Harrison K, Broecker W, Bonani G (1993) A strategy for estimating the impact of CO<sub>2</sub> fertilization on soil carbon storage. *Global Biogeochem Cycles* 7:69–80.
- Hofmockel KS, Zak DR, Moran KK, Jastrow JD (2011) Changes in forest soil organic matter pools after a decade of elevated CO<sub>2</sub> and O<sub>3</sub>. *Soil Biol Biochem* 43: 1518–1527.

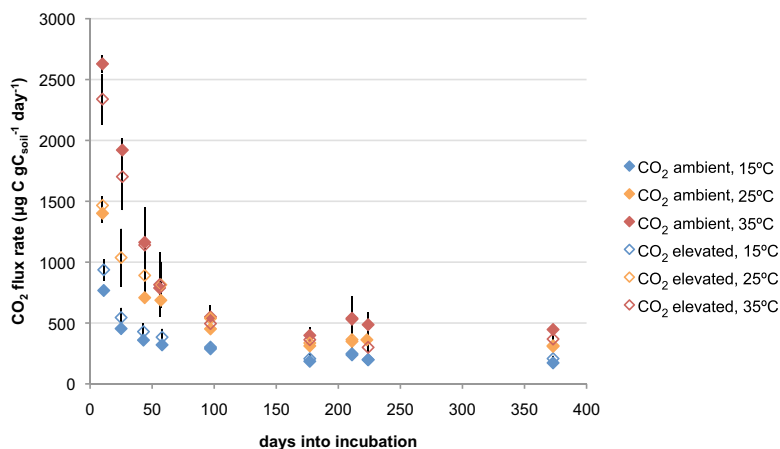

Fig. S1. CO<sub>2</sub> fluxes (micrograms C grams soil<sup>-1</sup> day<sup>-1</sup>) over 373 d of incubation of Duke FACE soils. Solid symbols represent fluxes from the ambient CO<sub>2</sub> treatment, and open symbols represent fluxes from the elevated CO<sub>2</sub> treatment. Colors (blue, 15 °C; yellow, 25 °C; red, 35 °C) denote incubation temperature. Error bars represent the SEM of samples from four replicate plots for each treatment.
